# Supplementary material
Source: publisher figshare collection journal article supplement (https://karger.figshare.com/ndownloader/files/36564345)
Supplement: Supplementary file 1 [file 36564345]

**Supplementary Table 3.** Spearman's correlation coefficients between the spot urinary and dietary sodium-to-potassium ratio by subgroup

| Subgroups | Correlation coefficients |
| --- | --- |
| Men | 0.149 |
| Women | 0.212 |
| Age ≥70 years | 0.194 |
| Age <70 years | 0.176 |
| Diabetes | 0.178 |
| Without diabetes | 0.186 |
| Hypertension | 0.157 |
| Without hypertension | 0.210 |
| eGFR <60 mL/min/1.73 m2 | 0.202 |
| eGFR ≥60 mL/min/1.73 m2 | 0.181 |
